# Supplementary material for: Impaired cardiac performance, protein synthesis, and mitochondrial function in tumor-bearing mice
Source: PubMed Central journal article supplement (PMC6919625; doi:10.1371/journal.pone.0226440), 2019-12-18

**A**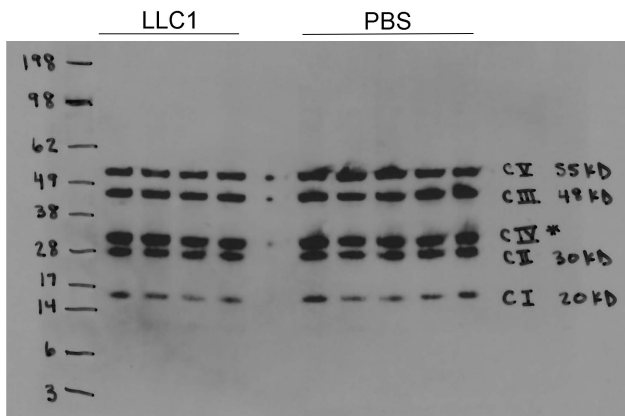**B**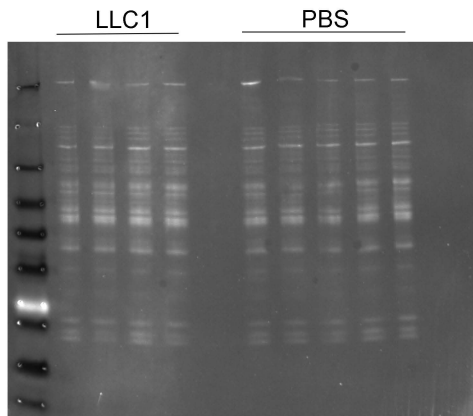

Supplement: pone.0226440.s002.pdf [file pone.0226440.s002.pdf]
